# Supplementary material
Source: publisher figshare collection journal article supplement (https://karger.figshare.com/ndownloader/files/24814796)
Supplement: Supplementary file 1 [file 24814796]

**Supplemental Table. Comparisons between the high-intermediate (H-I) and normal (N) hsTnI groups and the high-mild**

| **Variables** | | **hsTnI** | | **p value** |  | **BNP** | | **p value** |
| --- | --- | --- | --- | --- | --- | --- | --- | --- |
| **H-I group** | **N group** |  | **H-mild H group** | **N group** |
| No. of patients | | 27 | 116 | - |  | 39 | 104 | - |
| Age (median [IQR]) (y) | | 45 [38-54] | 40 [32-51] | 0.08 |  | 47 [40-53] | 40 [31-51] | 0.03 |
| Sex (male/female) [number (%)] | | 5/22 (19/81) | 27/89 (23/77) | 0.58 |  | 5/34 (13/87) | 27/77 (26/74) | 0.09 |
| Smoker [number (%)] | | 4 (15) | 30 (26) | 0.32 |  | 8 (21) | 26 (25) | 0.66 |
| Weight (median [IQR]) (kg) | | 51 [46-62] | 53 [48-60] | 0.59 |  | 51 [45-60] | 53 [48-60] | 0.11 |
| BMI (median [IQR]) (kg/m2) | | 20.6 [18.7-26.4] | 20.7 [19.1-23.0] | 0.74 |  | 20.4 [18.2-22.8] | 20.8 [19.1-23.0] | 0.31 |
| SBP (median [IQR]) (mmHg) | | 143 [120-157] | 133 [125-149] | 0.59 |  | 133 [122-153] | 137 [125-152] | 0.70 |
| DBP (median [IQR]) (mmHg) | | 85 [73-94] | 83 [77-94] | 0.89 |  | 82 [75-89] | 85 [78-95] | 0.28 |
| HR (median [IQR]) (beats/minute) | | 89 [83-108] | 90 [79-105] | 0.53 |  | 86 [80-116] | 90 [79-106] | 0.87 |
| Atrial fibrillation [number (%)] | | 1 (3.7) | 3 (2.6) | 0.57 |  | 2 (5.1) | 2 (1.9) | 0.30 |
| Laboratory tests at diagnosis | |  |  |  |  |  |  |  |
|  | eGFR (median [IQR])  (mL/min/1.73 m2) | 132.7 [108.83-150.8] | 127.8 [103.1-159.1] | 0.80 |  | 135.6 [111.0-175.1] | 126.6 [101.9-151.8] | 0.09 |
|  | Hb (median [IQR]) (g/dL) | 12.9 [11.7-13.4] | 13.2 [12.2-14.2] | 0.03 |  | 12.1 [11.1-12.8] | 13.4 [12.7-14.2] | <0.0001 |
|  | FT3 (median [IQR]) (pg/mL) | 18.2 [11.61-24.6] | 16.7 [11.7-24.8] | 0.62 |  | 17.3 [12.5-29.4] | 15.6 [11.1-23.0] | 0.05 |
|  | FT4 (median [IQR]) (ng/dL) | 5.5 [3.0-7.1] | 4.6 [3.5-7.1] | 0.62 |  | 5.48 [3.91-7.77] | 4.41 [3.3-6.1] | 0.02 |
|  | TBII (median [IQR]) (IU/L) | 14.8 [4.6-22.1] | 8.65 [2.9-21.6] | 0.18 |  | 15.5 [4.6-31.6] | 8.0 [2.8-19.3] | 0.01 |
|  | hsTnI (median [IQR]) (pg/mL) | 13.3 [7.1-16.3] | 1.6 [0.7-2.455] | <0.0001 |  | 2.9 [1.6-13.6] | 1.6 [0.7-3.0] | 0.0001 |
|  | BNP (median [IQR]) (pg/mL) | 40.7 [26.2-64.6] | 21.0 [11.7-37.7] | 0.0004 |  | 58.2 [50.2-95.1] | 16.1 [10.5-26.7] | <0.0001 |
| Thyroid volume  (median [IQR]) (mL) | | 30 [18-45] | 32 [21-45] | 0.96 |  | 32 [21.8-49.0] | 31 [20.0-40.0] | 0.28 |

**high (H-mild H) and normal (N) BNP groups**

IQR, interquartile range; BMI, body mass index; SBP, systolic blood pressure; DBP, diastolic blood pressure; HR, heart rate; eGFR, estimated glomerular filtration rate; Hb, hemoglobin; FT3, free T3; FT4, free T4; TSH, thyroid stimulating hormone; TBII, TSH binding inhibitory immunoglobulin; BNP, brain natriuretic peptide; hsTnI, high-sensitive troponin I.
